# Supplementary material for: Comparative Genomic Analysis of Two Novel Sporadic Shiga Toxin-Producing Escherichia coli O104:H4 Strains Isolated 2011 in Germany
Source: PLoS One. 2015 Apr 2;10(4):e0122074. doi: 10.1371/journal.pone.0122074 (PMC4383531; doi:10.1371/journal.pone.0122074)
Supplement: S2 Dataset — (FASTA) [file pone.0122074.s002.fasta]

>11-07153
CCGATAATAAGGGTCCCGTAAGCTACCGGCCGCCCTACGGGATATAGTGTACGGTCGAAACAATTCGGGCTTCCCTACTCGTGCGCATAGGAAGGTCAGCGTGCCGCGTATCTTCGCCGGCACAAAACCCGCATTCCGCCGATGCGTGGGCCTATGTATACCCCCGGGGGGAGTTCCCCACTGCATACCCCGTAGCAATTCTCTCTTCAGTTCGTAGTTCCCGG
>11-06681
CCGATAATTAGGGTCCCGTAAGCTACCGGCCGCCCTACGGGATATAGTGTACGGTCGAAACAATTCGGGCTTCCCTACTCTTGCGCATAGGAAGGGCAGCGTGCCGCGTATCTTCGCCGGCACAAAACCCGTATTCCGCCGATGTGTGGGCCTATGTATACCCCCGGGGGGAGTTCCCCTCTGCATACCCCGTAGCCATTCCCTCTTCAGCTCGCAGTTCCCGG
>11-02027
CCGATAATTAGGGTCCCGTCTGCTACCGGCCGCCCTACGGGATATAGTGTACGGACGAAACAATTCGGGCTTCCCTACTCTTGCGCATAGGAAGGTCAGCGTGCCGCGTATCTTCGACGGCACAAAACCCGTATTCCGCCGATGTGTGGGCCTATGTATACCCCCGGGGGGAGTTCCCCTCCGCATACCCCGTAGCCATTCCCTCTTCAGCTCGTAGTTCCCGG
>C-3493_USA_2011
CCGATAATTAGGGTCCCGTCTGCTACCGGCCGCCCTACGGGATATAGTGTACGGTCGAAACAATTCGGGCTTCCCTACTCTTGCGCATAGGAAGGTCAGCGTGCCGCGTATCTTCGCCGGCACAAAACCCGTATTCCGCCGATGTGTGGGCCTATGTATACCCCCGGGGGGAGTTCCCCTCCGCATACCCCTTAGCCATTCCCTCTTCAGCTCGTAGTTCCCGG
>11-02135
CCGATAATTAGGGTCCCGTCTGCTACATGCCGCCCTACGGCATCTAGTGTACGGTCGCAACAATGCGGGCTACCCTACTCTTGGGCATAGTAACGTCAGTGTCCCGCGTCCCTTCGCCGGCACAAAACCCGTATTTCGCCGAGGTGTGGGCCTATTTATACCCCCGGGTGGAGCTCCCCTCCGCATACCCCTTAGCCATTCCCTCTTCAGCTCGTAGTACCCGG
>11-03944
CCGATAATTAGGCTCCCGTCTTCAACCGGCCGCCCTACGGGCTATTGTGTACGGTCGAAACAATTCGGGCTTCACTACTCTTGCGCTTAGGAAGGTCAGCGTGCCGCGTATCTTCGCCTTAACAAAACCCGTATACCGCCGATATGAGGGCCTATGTATACCCCCGGGGGGAGTTCCCCACCGCATACCACTTATCCATTCCCTCTTCAGCTCGTAGTTCCCGG
>11-06601
CCGATAATTAGGGTCCCGTCTGCTACCGGCCGCCCTATGGGATATAGTATACGGTCGAAACAATTGGCGCTTCCCCACTCTAGCGCATAGGAAGGTCAGCGTGCCGCGTATCTTCGCCGGCACAAAACCCGTAGTCCGCCAATGTGTGGGCATATGTATTCCCCCGGAGGCAGTTCCCCTCCGCTTACCCCTTAGCCATTTCCTCTTCAGCTCGTAGTTCCCGG
>11-06782
TCGATAATTAGGGTCCCATCTGCTACCGGCAGCCCTTCGGGATATAGTGTACGGTCGATACAATTCGGGCTTCCCTACACTTGCGCATAGGAAGGTCAGCGTGCCGCGTATCTTCGCCGGCTCATAACCCGTATTCCGACGATGTATGGGCCTATGTATACCCCCGGGGGGAGTTCCCCTACGCATACCCCTTAGCCATGCCCTCTTCATCTCGTAGTTCCCGG
>11-06811
CCGATAATTAGGGTACCGTCTGCTACCGACCGCCCTACTGGATATAGTGTACGGTCGAAACAATTCGGGCTTCCCTACTCTTGCGCATAGGAAGGTCAGCCTGCCGCGTATCTTCGCCGGCACAAAACCCATTTTCCGCCGATGTGTGGGACTATGTATACCCCAGGGGGGAGTTACCCTCCGCATACCCCTTTGCCAATCCCTCTTCAGCTCGTAGTTCCCGG
>11-04083
CCTATAGTTAGGGTCCCGTCTGCTTCCGGCCGCCCAACGGGATAAAGTGTACGGTTGAAACAATTCAGGCTTCCCTACTCTTGCGCATAGGAAGGTCAGCGTGCCGCGTATCTTAGCCGGCACAAAACCCGCATTCCGCCGATGTGTGGGCCTATGTATACCCCCGGGGTGAGTTCCCCACCGCATACCCCGAAGCCATTCCCTCTTCAGCTCGTGGTTCCCGG
>11-03424
CCGATAATTAGGGTCCCGTCTGCTACCGGCCGCCCTACGGGATATAGTGTACGGTCGAAACAACTCGGGCTTCCCTACTCTTGCGCATAAGAAGGTCAGCGAGCCGCGGATCTTCGCCGGCACAAAACCCGTATTCCGCCGATGTGTGTGCCGAAGTATACCCCCGGGGGGAGTGCCCCTCCTCATACCCCGTAGCCATTCCCTCTTCAGCTCGTAGTTCCCGG
>11-02058
CCGATAACTAGGGTCACGTCTGCTACCGGCCGGCCTACGGGAAATAGTGTACGGTCGAAACAATTCGGGCTTCCCTAGTCTTGCGCATTGGAAGGTCCGCGTGCCGCGTATCTCCGCCGGCACAAAACCCGCATTCCGCCGATGTGTGGGCCTATGTATACCCCCGGGGGGAGTTCCCCTCCGCATACCCCGTAGCCATTCCCTCTTCAGCTCGTAGTTCCCGG
>11-06837
CCGATAATTACGGTCCCGTCTGCTACCGGCCGCCCTACGGGATATAGTGTACGGTCGAATCAATTCGGGCTTCCCTACTCTTGCGCATAGGTAGGTCAGCGTGCCGCGTATCTTCGCCGGCACAAAGCCCGTATTCCGCCGATGTGTGGGCCTATGTATACCCCCGGGGGGAGTTCCCCTCCGCATTCCCCTTAGCCATTCCCTCTTCATCTCGTAGTTCCCGG
>EL-2071_Georgia_2009
CCGATAATTAGGGTCCCGTAAGCTACCGGCCGCCCTACGGGATATAGTGTACGGTCGAAACAATTCGGGCTTTCCTACTCTTGCGCATAGGAAGGTCAGCGTGCCGCGTATCTTCGCCGGCACAAAACCCGTATTCCGCCGATGTGTGGGCCTATGTATACCCCCGGGGGGAGTTCCCCTCCGCATACCCCGTAGCCATTCCCTCTTCAGCTCGTAGTTCCCGG
>Ec11-9450_France_2011
CCGATAATTAGGGTCCCGTAAGCTACCGGCCGCCCTACGGGATATAGTGTACGGTCGAAACAATTCGGGCTTCCCTACTCTTGCGCATAGGAAGGTCAGCGTGCCGCGTATCTTCGCCGGCACAAAACCCGTATTCCGCCGATGTGTGGGCCTATGTATACCCCCGGGGGGAGTTCCCCTCTGCATACCCCGTAGCCATTCCCTCTTCAGCTCGTAGTTCCCGG
>Ec12-0465_France_2012
CCGATAATTAGGGTCCCGTAAGCTACCGGCCGCCCTACGGGATATAGTGTACGGTCGAAACAATTCGGGCTTCCCTACTCTTGCGCATAGGAAGGTCAGCGTGCCGCGTATCTTCGCCGGCACGAAACCCGTATTCCGCCGATGTGTGGGCCTATGTATACCCCCGGGGGGAGTTCCCCTCTGCATACCCCGTAGCCATTCCCTCTTCAGCTCGTAGTTCCCGG
>EL-2050_Georgia_2009
CCGATAATTAGGGTCCCGTAAGCTACCGGCCGCCCTACGGGATATAGTGTACGGTCGAAACAATTCGGGCTTCCCTACTCTTGCGCATAGGAAGGTCAGCGTGCCGCGTATCTTCGCCGGCACAAAACCCGTATTCGGCCGATGTGTGGGCCTATGTATACCCCCGGGGGGAGTTCCCCTCTGCATAGCCCGTAGCCATTCCCTCTTCAGCTCGTAGTTCCCGG
>Ec12-0466_France_2012
CCGATTATTAGGGTCCCGTATGCTACCGGCCGCCCTACGGGATATAGTGTACGGTCGAAACAATTCGGGCTTCCCTACTCTTGCGCATAGGAAGGTCAGCGTGCCGCGTATCTTCGCCGGCACAAAACCCGTATTCCGCCGATGTGTGGGCCTATGTATACCCCCGGGGGGTGTTCCCCTCCGCATACCCCTTAGCCATTCCTTCTGCAGCTCGTAGTTCCCGC
>Ec11-9941_France_2011
CCGATAATTAGGGTCCTGTATGCTACCGGCCGCCATACGGGATATAGTGTACGGTCGAAACAATTCGGGCTTCCCTACTCTTGCGCATAGGAAGGTCAGCGTGCCGCGTATCTTCGCCGGCACAAAACCCGTATTCCGCCGATGTGTGGGCCTATGTATACCCCCGGGGGGAGTTCACCTCCGCATACCCCGTAGCCATTCCCTCTGCAGCTCGTAGTTCACGG
>Ec11-9990_France_2011
CCGATAATTAGGGTCCTGTATGCTACCGGCCGCCATACGGGATATAGTGTACGATCGAAACAATTCGGGCTTCCCTACTCTTGCGCATAGGAAGGTCAGCGTGCCGCGTATCTTCGCCGGCACAAAACCCGTATTCCGCCGATGTGTGGGCCTATGTATACCCCCGGGGGGAGTTCCCCTCCGCATACCCCGTAGCCATTCCCTCTGCTGCTCGTAGTTCCCGG
>Ec04-8351_France_2004
CGGTAAATTTGTGTCCCGCAAGATAGCGGCCGCACTACGGGATATACTGAATAGTCGAAAGATTTCGGGCATCCCTTCTCTTGCGCAGAGGAAGTTCAGCGTGCGCCGTATCATCCCCGGCATAACACATGTATTCCGCCGTTGTGTGGTCCTATGGGAATCCCCGCGGGGATTTCCCCTCCGTATACCCTGTAGGCTTTCCCGCTTCAGCCCGTAGCTCCAAG
>Ec09-7901_France_2009
CGGAAAATTTGGGTCCCGCAAGATAGCGGCCGCACTACGGGATATAGTGAATAGTCTAAAGCTTTCGGGCATCCCTTCTCTTGCGCAGAGGAAGTTCAACGTGCGCCGTATCTTCCCCGGCATAACACATGTATTCCGCTGTTGTGTTGTCCTATGGGTACCTACGCGGGGATTTCCCCTCCGTACACTCTGTAGCCTTTCCCTCATCAGCCCATAGCTTCAAG
>01-09591_Germany_2001
CGGATAATTTGGGGCCCGCAAGCTACCGGTCACACTACGTGATATAGCGAGCGGTCGAAAGAATTCGGCTATCCTTACTATTACAAAGAGGATGTTAAGCGTGAGCACTATGTTCCCAGGCATAACAAACATATTCCTCCGTTGTGTGGTCCTTTGGGTACACCCACGGGGATTTCCAATCCGTATACCCTTTAGCCTTTCCCTATTTATCCAGTAACTCCAGG
